# Supplementary material
Source: PubMed Central journal article supplement (PMC8191372)
Supplement: cir-143-2346-s001.pdf [file cir-143-2346-s001.pdf]

**SUPPLEMENTAL MATERIAL**

**Supplemental Table I. Observed Heart Disease and Cerebrovascular Disease Deaths per Million by Race and Ethnicity**

**Supplemental Figure I. Predicted Log of Risks from Poisson Regression vs. Log of Observed Risks**

**Supplemental Table I. Observed Heart Disease and Cerebrovascular Disease Deaths per Million by Race and Ethnicity**

|                           | <b>Heart disease deaths per million, 2019*</b> | <b>Heart disease deaths per million, 2020*</b> | <b>Cerebrovascular disease deaths per million, 2019*</b> | <b>Cerebrovascular disease deaths per million, 2020*</b> |
|---------------------------|------------------------------------------------|------------------------------------------------|----------------------------------------------------------|----------------------------------------------------------|
| <b>Non-Hispanic White</b> | <b>1208.7</b>                                  | <b>1234.2</b>                                  | <b>258.2</b>                                             | <b>268.7</b>                                             |
| <b>Age</b>                |                                                |                                                |                                                          |                                                          |
| < 44                      | 34.7                                           | 39.3                                           | 4.40                                                     | 4.83                                                     |
| 45 – 64                   | 677.7                                          | 723.0                                          | 92.8                                                     | 101.0                                                    |
| 65 +                      | 5165.7                                         | 5222.4                                         | 1181.0                                                   | 1222.3                                                   |
| <b>Gender</b>             |                                                |                                                |                                                          |                                                          |
| Female                    | 1095.3                                         | 1105.6                                         | 295.9                                                    | 306.3                                                    |
| Male                      | 1325.0                                         | 1366.0                                         | 219.6                                                    | 230.2                                                    |
| <b>Non-Hispanic Black</b> | <b>965.2</b>                                   | <b>1145.3</b>                                  | <b>235.3</b>                                             | <b>267.0</b>                                             |
| <b>Age</b>                |                                                |                                                |                                                          |                                                          |
| < 44                      | 84.3                                           | 96.3                                           | 9.8                                                      | 12.8                                                     |
| 45 – 64                   | 1151.9                                         | 1360.1                                         | 221.5                                                    | 253.3                                                    |
| 65 +                      | 5207.1                                         | 6212.5                                         | 1445.6                                                   | 1627.8                                                   |
| <b>Gender</b>             |                                                |                                                |                                                          |                                                          |
| Female                    | 855.0                                          | 1022.2                                         | 247.3                                                    | 274.4                                                    |
| Male                      | 1085.4                                         | 1279.7                                         | 222.2                                                    | 258.8                                                    |
| <b>Non-Hispanic Asian</b> | <b>383.0</b>                                   | <b>454.6</b>                                   | <b>136.1</b>                                             | <b>156.6</b>                                             |
| <b>Age</b>                |                                                |                                                |                                                          |                                                          |
| < 44                      | 10.02                                          | 10.27                                          | 0.00                                                     | 1.88                                                     |
| 45 – 64                   | 224.0                                          | 266.7                                          | 64.9                                                     | 79.9                                                     |
| 65 +                      | 2432.1                                         | 2893.1                                         | 909.0                                                    | 1026.9                                                   |
| <b>Gender</b>             |                                                |                                                |                                                          |                                                          |
| Female                    | 328.4                                          | 390.2                                          | 146.6                                                    | 166.0                                                    |
| Male                      | 442.9                                          | 525.3                                          | 124.5                                                    | 146.2                                                    |
| <b>Hispanic</b>           | <b>341.3</b>                                   | <b>403.1</b>                                   | <b>95.0</b>                                              | <b>106.4</b>                                             |
| <b>Age</b>                |                                                |                                                |                                                          |                                                          |
| < 44                      | 20.3                                           | 23.3                                           | 3.96                                                     | 3.57                                                     |
| 45 – 64                   | 371.2                                          | 444.9                                          | 86.6                                                     | 100.3                                                    |
| 65 +                      | 3288.5                                         | 3873.5                                         | 975.2                                                    | 1092.1                                                   |

| <b>Gender</b> |       |       |       |       |
|---------------|-------|-------|-------|-------|
| Female        | 297.9 | 344.4 | 101.7 | 111.7 |
| Male          | 383.9 | 460.8 | 88.4  | 101.3 |

\*Data represent observed deaths that occurred from March through August in each year

### Supplemental Figure I. Predicted Log of Risks from Poisson Regression vs. Log of Observed Risks

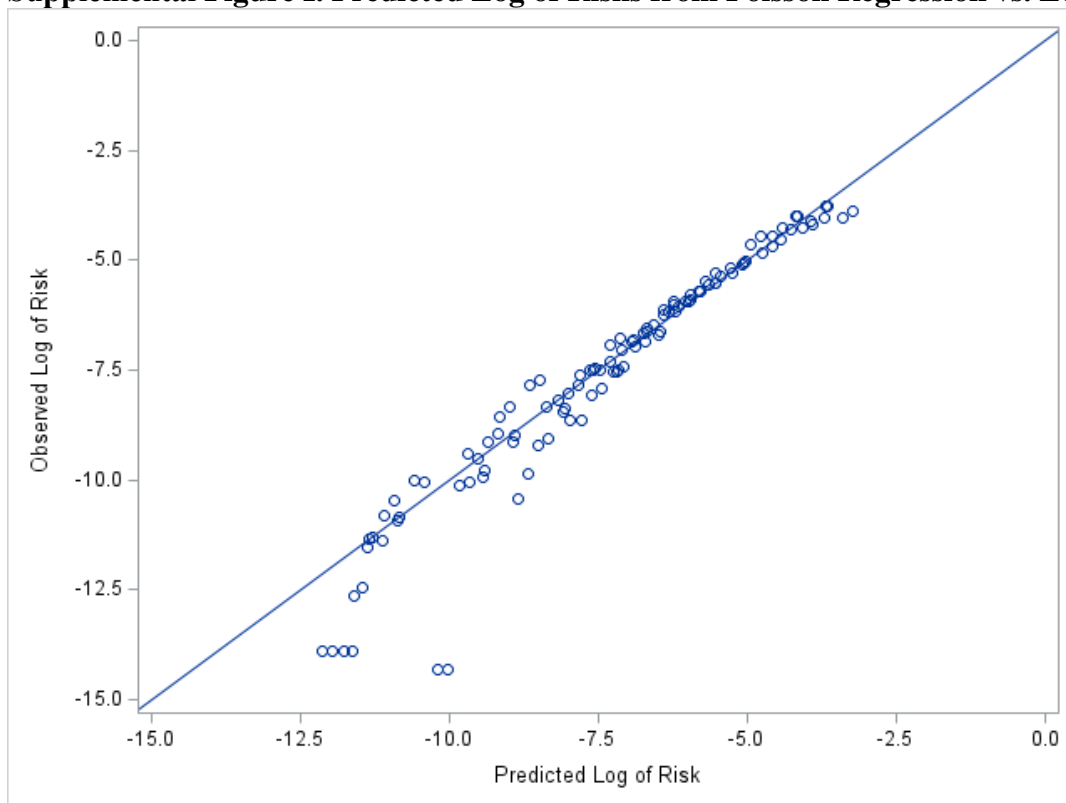

Predicted log of risks from the Poisson regression with year, race/ethnicity, interaction term for year and race/ethnicity, as well as age and sex categories compared with the log of observed risks (e.g. log of number of deaths divided by number of population).
